# Supplementary material for: The Synthesis, Characterization and Anti-Tumor Activity of a Cu-MOF Based on Flavone-6,2′-dicarboxylic Acid
Source: MDPI journal article supplement (doi:10.3390/molecules28010129), 2022-12-23

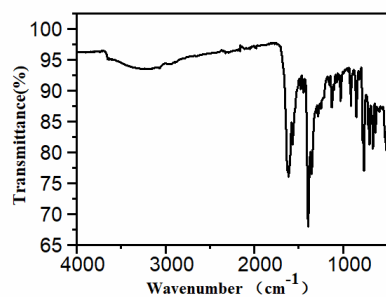

Figure S1. IR spectrum of LDU-1

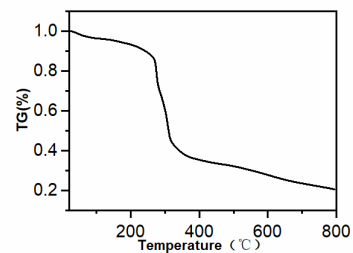

Figure S2. TG curve of LDU-1

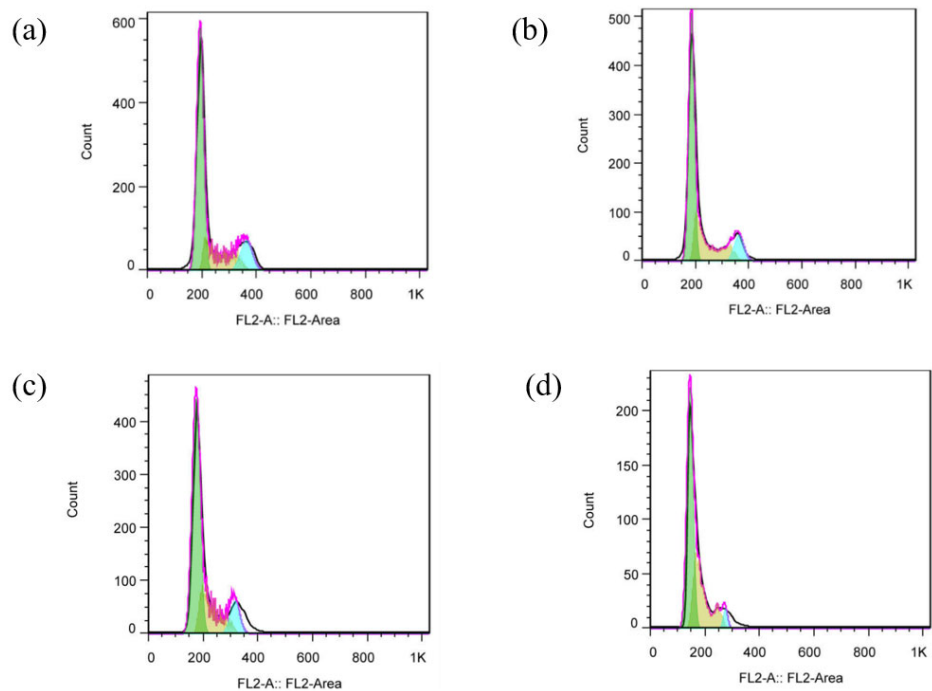

Figure S3. Cell cycle phase distribution of the A549 cells as measured by flow cytometry after treatment with PBS(a), cisplatin(b), H<sub>2</sub>L(c) and LDU-1(d).

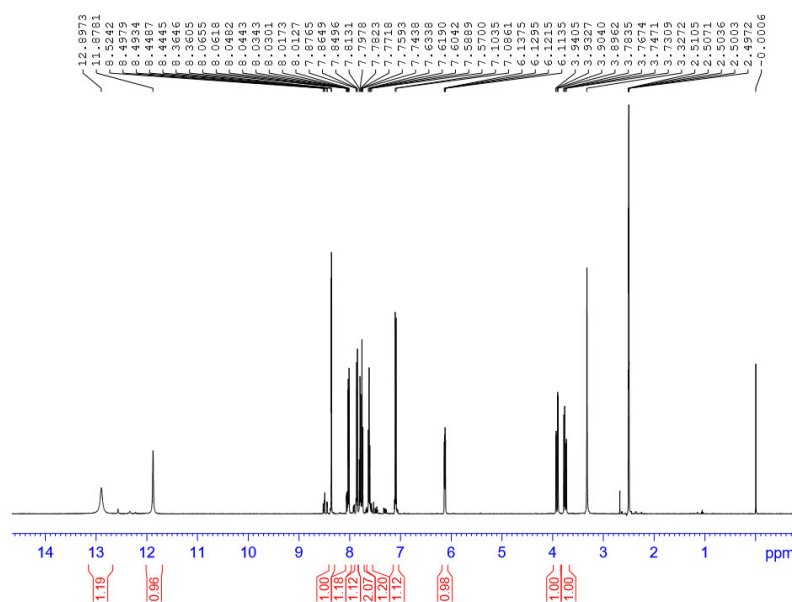

Figure S4. <sup>1</sup>H NMR of 2-hydroxychalcone-2,5'-carboxylic acid(2)

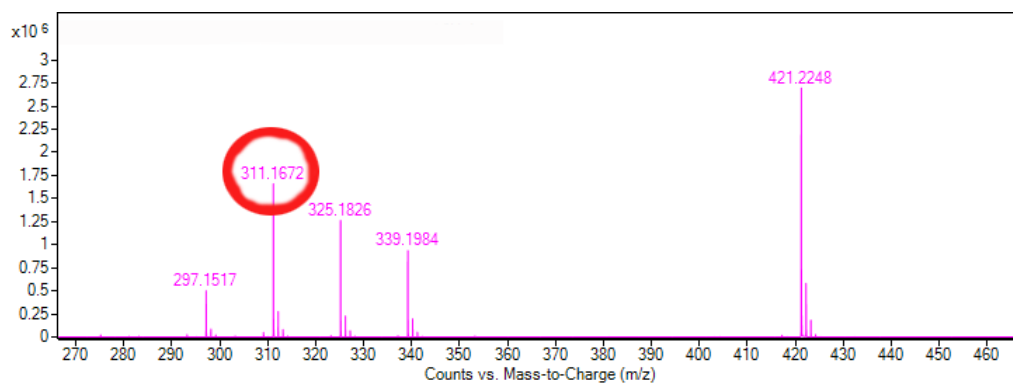

Figure S5. Mass spectrum of H<sub>2</sub>L

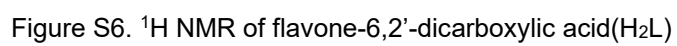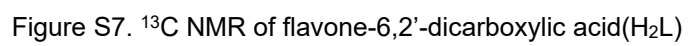

Supplement: s1 [file s1]
